# Supplementary material for: The role of the nucleus for cell mechanics: an elastic phase field approach
Source: Royal Society of Chemistry journal article supplement (doi:10.1039/d4sm00345d), 2024-01-01
Supplement: d4sm00345d1.pdf [file d4sm00345d1.pdf]

*Supplementary materials to*  
**The role of the nucleus for cell mechanics: an elastic phase field approach**

Robert Chojowski, Ulrich S. Schwarz, and Falko Ziebert

## Supplementary movies

### **Supplementary movie 1: Failure of a focal adhesion**

A cell with nucleus was allowed to spread in a hexagonal adhesion pattern and to contract isotropically until it reached mechanical equilibrium. Subsequently, the most right adhesion spot was removed and the cell evolved towards a new mechanical equilibrium; cf. Fig. 4 of the main manuscript. Parameters as described there.

### **Supplementary movie 2: Compression experiment for a spherical cell**

Compression of a spherical cell of axial symmetry between two plates, cf. Fig. 5 A of the main manuscript. Parameters as described there with  $E_N/E_C = 1$ .

### **Supplementary movie 3: Compression experiment for a spherical cell**

Compression of a spherical cell of axial symmetry between two plates, cf. Fig. 5 A of the main manuscript. Parameters as described there with  $E_N/E_C = 10$ .

### **Supplementary movie 4: Compression experiment for a pancake-shaped cell**

Compression of a pancake-shaped cell of axial symmetry between two plates, cf. Fig. 5 D of the main manuscript. Parameters as described there with  $E_N/E_C = 1$ .

### **Supplementary movie 5: Compression experiment for a pancake-shaped cell**

Compression of a pancake-shaped cell of axial symmetry between two plates, cf. Fig. 5 D of the main manuscript. Parameters as described there with  $E_N/E_C = 10$ .

### **Supplementary movie 6: Micropipette aspiration experiment for a spherical cell**

A spherical cell is sucked into a micropipette by a pressure  $\Delta P/E_C = 0.5$ , cf. Fig. 6 A of the main manuscript. Parameters as described there with  $E_N/E_C = 10$ .
